# Supplementary material
Source: publisher figshare collection journal article supplement (https://springernature.figshare.com/ndownloader/files/15364073)
Supplement: Supplementary file [file 15364073]

## Surgeons and Preventative Health Survey

This survey takes approximately 15-20 minutes to complete.

This survey has been adapted with permission from a survey used by Laws et al, 2008 doi:10.1186/1472-6963-8-44. We would like to thank the authors for their permission to use the survey.

It will be analysed by researchers and reported as group findings- no individual responses will be reported.

### Clinician details

**Gender:** ☐ Female ☐ Male

**Age:**

**Working status:** ☐ Full-time ☐ Part-time

If part-time, how many hours do you work per week? \_\_\_\_\_

**Clinician type:** ☐ General Surgeon (GS) ☐ Orthopedic Surgeon (OS)  
☐ (GS) Registrar ☐ (OS) Registrar

How many years of clinical practice have you undertaken? \_\_\_\_\_

**Please circle the appropriate answer**

### Management of risk factors

1. Thinking of the new clients that you have seen over the **past 2 weeks**, what percentage of these clients did you **ask** about the following risk factors:

|                          |      |       |        |        |      |
|--------------------------|------|-------|--------|--------|------|
| <b>Smoking</b>           | None | 1-25% | 26-50% | 51-75% | >75% |
| <b>Nutrition</b>         | None | 1-25% | 26-50% | 51-75% | >75% |
| <b>Alcohol</b>           | None | 1-25% | 26-50% | 51-75% | >75% |
| <b>Physical Activity</b> | None | 1-25% | 26-50% | 51-75% | >75% |

2. Thinking of the clients that you have seen for **review appointments** over the **past 2 weeks**, what percentage of these clients did you **ask** about the following risk factors:

|                          |      |       |        |        |      |
|--------------------------|------|-------|--------|--------|------|
| <b>Smoking</b>           | None | 1-25% | 26-50% | 51-75% | >75% |
| <b>Nutrition</b>         | None | 1-25% | 26-50% | 51-75% | >75% |
| <b>Alcohol</b>           | None | 1-25% | 26-50% | 51-75% | >75% |
| <b>Physical Activity</b> | None | 1-25% | 26-50% | 51-75% | >75% |

3. Of the clients that you identified as having a lifestyle risk factor in the **past 2 weeks**, what percentage of these clients did you **assess their readiness to change their behaviour** (stage of change):

|                                      |      |       |        |        |      |                                                           |
|--------------------------------------|------|-------|--------|--------|------|-----------------------------------------------------------|
| <b>Smokers</b>                       | None | 1-25% | 26-50% | 51-75% | >75% | did not identify any smokers                              |
| <b>Clients with poor nutrition</b>   | None | 1-25% | 26-50% | 51-75% | >75% | did not identify any clients with poor nutrition          |
| <b>Clients with at risk drinking</b> | None | 1-25% | 26-50% | 51-75% | >75% | did not identify any clients with at risk drinking        |
| <b>Physically inactive clients</b>   | None | 1-25% | 26-50% | 51-75% | >75% | did not identify any clients who were physically inactive |

4. Of the clients that you identified as having a lifestyle risk factor in the **past 2 weeks**, what percentage of these clients did you provide **verbal advice** to:

|                                      |      |       |        |        |      |                                                           |
|--------------------------------------|------|-------|--------|--------|------|-----------------------------------------------------------|
| <b>Smokers</b>                       | None | 1-25% | 26-50% | 51-75% | >75% | did not identify any smokers                              |
| <b>Clients with poor nutrition</b>   | None | 1-25% | 26-50% | 51-75% | >75% | did not identify any clients with poor nutrition          |
| <b>Clients with at risk drinking</b> | None | 1-25% | 26-50% | 51-75% | >75% | did not identify any clients with at risk drinking        |
| <b>Physically inactive clients</b>   | None | 1-25% | 26-50% | 51-75% | >75% | did not identify any clients who were physically inactive |

5. Of the clients that you identified as having a lifestyle risk factor in the **past 2 weeks**, what percentage of these clients did you provide **written advice (e.g. pamphlet, summary sheet etc)** to:

|                                      |      |       |        |        |      |                                                           |
|--------------------------------------|------|-------|--------|--------|------|-----------------------------------------------------------|
| <b>Smokers</b>                       | None | 1-25% | 26-50% | 51-75% | >75% | did not identify any smokers                              |
| <b>Clients with poor nutrition</b>   | None | 1-25% | 26-50% | 51-75% | >75% | did not identify any clients with poor nutrition          |
| <b>Clients with at risk drinking</b> | None | 1-25% | 26-50% | 51-75% | >75% | did not identify any clients with at risk drinking        |
| <b>Physically inactive clients</b>   | None | 1-25% | 26-50% | 51-75% | >75% | did not identify any clients who were physically inactive |

6. Of the clients that you identified as having a lifestyle risk factor in the **past 2 weeks**, what percentage of these clients did you **refer to other service providers/agencies or support groups (quitline)** for help in managing their risk factor:

|                                      |      |       |        |        |      |                                                           |
|--------------------------------------|------|-------|--------|--------|------|-----------------------------------------------------------|
| <b>Smokers</b>                       | None | 1-25% | 26-50% | 51-75% | >75% | did not identify any smokers                              |
| <b>Clients with poor nutrition</b>   | None | 1-25% | 26-50% | 51-75% | >75% | did not identify any clients with poor nutrition          |
| <b>Clients with at risk drinking</b> | None | 1-25% | 26-50% | 51-75% | >75% | did not identify any clients with at risk drinking        |
| <b>Physically inactive clients</b>   | None | 1-25% | 26-50% | 51-75% | >75% | did not identify any clients who were physically inactive |

7. When you provide advice about lifestyle risk factors, **how much time do you estimate that you spend on average addressing each of the following:**

|                                 |          |          |           |            |                   |                       |
|---------------------------------|----------|----------|-----------|------------|-------------------|-----------------------|
| <b>Smoking advice</b>           | 1-2 mins | 3-5 mins | 6-10 mins | 11-15 mins | More that 15 mins | Do not provide advice |
| <b>Nutrition advice</b>         | 1-2 mins | 3-5 mins | 6-10 mins | 11-15 mins | More that 15 mins | Do not provide advice |
| <b>Alcohol advice</b>           | 1-2 mins | 3-5 mins | 6-10 mins | 11-15 mins | More that 15 mins | Do not provide advice |
| <b>Physical activity advice</b> | 1-2 mins | 3-5 mins | 6-10 mins | 11-15 mins | More that 15 mins | Do not provide advice |

8. For clients that you have given advice to about their lifestyle, what percentage of these clients do you **check their progress** in subsequent visits (on average):

|                                      |      |       |        |        |      |                                                           |
|--------------------------------------|------|-------|--------|--------|------|-----------------------------------------------------------|
| <b>Smokers</b>                       | None | 1-25% | 26-50% | 51-75% | >75% | did not identify any smokers                              |
| <b>Clients with poor nutrition</b>   | None | 1-25% | 26-50% | 51-75% | >75% | did not identify any clients with poor nutrition          |
| <b>Clients with at risk drinking</b> | None | 1-25% | 26-50% | 51-75% | >75% | did not identify any clients with at risk drinking        |
| <b>Physically inactive clients</b>   | None | 1-25% | 26-50% | 51-75% | >75% | did not identify any clients who were physically inactive |

9. How easy is it to find **accessible services/agencies/support programs to refer** your clients to for the following?  
(1=Very difficult, 5= very easy)

|                              | <b>Very difficult</b> |   |   | <b>Very easy</b> |   |            |
|------------------------------|-----------------------|---|---|------------------|---|------------|
| <b>Smoking cessation</b>     | 1                     | 2 | 3 | 4                | 5 | Don't know |
| <b>Nutrition counselling</b> | 1                     | 2 | 3 | 4                | 5 | Don't know |
| <b>Alcohol counselling</b>   | 1                     | 2 | 3 | 4                | 5 | Don't know |
| <b>Physical activity</b>     | 1                     | 2 | 3 | 4                | 5 | Don't know |

10. Please rate your **knowledge** in relation to each of the following (1=very poor, 5= excellent)

|                                                     | <b>Very poor</b> |   |   |   | <b>Excellent</b> |
|-----------------------------------------------------|------------------|---|---|---|------------------|
| Assessing nicotine dependency                       | 1                | 2 | 3 | 4 | 5                |
| <b>Smoking cessation recommendations</b>            | 1                | 2 | 3 | 4 | 5                |
| Assessing nutrition                                 | 1                | 2 | 3 | 4 | 5                |
| <b>Nutrition recommendations</b>                    | 1                | 2 | 3 | 4 | 5                |
| Assessing for risk alcohol consumption              | 1                | 2 | 3 | 4 | 5                |
| <b>Recommendations for safe alcohol consumption</b> | 1                | 2 | 3 | 4 | 5                |
| Assessing physical activity levels                  | 1                | 2 | 3 | 4 | 5                |
| <b>Physical activity recommendations</b>            | 1                | 2 | 3 | 4 | 5                |
| Motivational Interviewing                           | 1                | 2 | 3 | 4 | 5                |
| <b>Assessing a client's readiness to change</b>     | 1                | 2 | 3 | 4 | 5                |

11. Please rate how **confident** you are in undertaking the following activities with clients  
(1=not at all confident, 5= very confident)

|                                              | Not at all confident |   |   | Very confident |   |
|----------------------------------------------|----------------------|---|---|----------------|---|
| Assessing nicotine dependency                | 1                    | 2 | 3 | 4              | 5 |
| Smoking cessation recommendations            | 1                    | 2 | 3 | 4              | 5 |
| Assessing nutrition                          | 1                    | 2 | 3 | 4              | 5 |
| Nutrition recommendations                    | 1                    | 2 | 3 | 4              | 5 |
| Assessing for risk alcohol consumption       | 1                    | 2 | 3 | 4              | 5 |
| Recommendations for safe alcohol consumption | 1                    | 2 | 3 | 4              | 5 |
| Assessing physical activity levels           | 1                    | 2 | 3 | 4              | 5 |
| Physical activity recommendations            | 1                    | 2 | 3 | 4              | 5 |
| Motivational Interviewing                    | 1                    | 2 | 3 | 4              | 5 |
| Assessing a client's readiness to change     | 1                    | 2 | 3 | 4              | 5 |

12. Please rate how **effective** you think your advice is in helping clients to:  
(1=not at all effective, 5= very effective)

|                                         | Not at all effective |   |   | Very effective |   |                       |
|-----------------------------------------|----------------------|---|---|----------------|---|-----------------------|
| <b>Give up smoking</b>                  | 1                    | 2 | 3 | 4              | 5 | Do not provide advice |
| <b>Improve nutrition/ eating habits</b> | 1                    | 2 | 3 | 4              | 5 | Do not provide advice |
| <b>Reduce alcohol consumption</b>       | 1                    | 2 | 3 | 4              | 5 | Do not provide advice |
| <b>Become more physically active</b>    | 1                    | 2 | 3 | 4              | 5 | Do not provide advice |

13. Clients I see find it agreeable for me to raise the following lifestyle issues routinely as part of consultation:  
(1=strongly agree, 5= strongly disagree)

|                            | Not at all effective |   |   | Very effective |   |                                  |
|----------------------------|----------------------|---|---|----------------|---|----------------------------------|
| <b>Smoking</b>             | 1                    | 2 | 3 | 4              | 5 | Do not discuss smoking           |
| <b>Nutrition</b>           | 1                    | 2 | 3 | 4              | 5 | Do not discuss nutrition         |
| <b>Alcohol consumption</b> | 1                    | 2 | 3 | 4              | 5 | Do not discuss alcohol           |
| <b>Physically activity</b> | 1                    | 2 | 3 | 4              | 5 | Do not discuss physical activity |

14. Please rate **how important** you think the following lifestyle changes are for **improving health**:  
(1=not at all important, 5= very important)

|                                           | Not at all important |   |   | Very important |   |
|-------------------------------------------|----------------------|---|---|----------------|---|
| <b>Giving up smoking</b>                  | 1                    | 2 | 3 | 4              | 5 |
| <b>Improving nutrition/ eating habits</b> | 1                    | 2 | 3 | 4              | 5 |
| <b>Reducing alcohol consumption</b>       | 1                    | 2 | 3 | 4              | 5 |
| <b>Becoming more physically activity</b>  | 1                    | 2 | 3 | 4              | 5 |

15. Please rate **how important** you think it is to address these lifestyle risk factors with the clients you see:  
(1=not at all important, 5= very important)

|                     | Not at all important |   |   | Very important |   |
|---------------------|----------------------|---|---|----------------|---|
| Smoking             | 1                    | 2 | 3 | 4              | 5 |
| Nutrition           | 1                    | 2 | 3 | 4              | 5 |
| Alcohol consumption | 1                    | 2 | 3 | 4              | 5 |
| Physically activity | 1                    | 2 | 3 | 4              | 5 |

16. How much of a **work priority** is it for you/your tem to address lifestyle risk factors with clients as **part of your normal clinical work**:  
(1=not at all important, 5= very important)

|                              | Very low priority |   |   | Very high priority |   |
|------------------------------|-------------------|---|---|--------------------|---|
| Smoking cessation            | 1                 | 2 | 3 | 4                  | 5 |
| Poor nutrition               | 1                 | 2 | 3 | 4                  | 5 |
| At risk alcohol consumption  | 1                 | 2 | 3 | 4                  | 5 |
| Inadequate physical activity | 1                 | 2 | 3 | 4                  | 5 |

17. In the past 12 months have you had any education or training in the management of these risk factors or strategies towards helping clients change their behaviour?

|                                       |     |    |
|---------------------------------------|-----|----|
| Smoking                               | Yes | No |
| Nutrition                             | Yes | No |
| Alcohol                               | Yes | No |
| Physical Activity                     | Yes | No |
| Motivational Interviewing             | Yes | No |
| Assessing clients readiness to change | Yes | No |
| Client education                      | Yes | No |

18. Any other comments: \_\_\_\_\_

---

Thank you for completing the questionnaire.

| OFFICE USE ONLY | Date received | Date entered | Entered by (ID) |
|-----------------|---------------|--------------|-----------------|
|                 |               |              |                 |
